# Supplementary material for: CCR1 Signaling as a Common Injury Pathway in Retinal Degeneration
Source: Research Square preprint supplement (doi:10.21203/rs.3.rs-8775900/v1), 2026-02-22
Supplement: Supplementary file 1 [file 1dc9e4ede44adf6000d08a60.docx]

Supplementary Materials for

**CCR1 Signaling as a Common Injury Pathway in Retinal Degeneration**

Sarah Elbaz-Hayoun *et al.*

*Corresponding author. Email: chowers@hadassah.org.il

**This PDF file includes:**

Figs. S1


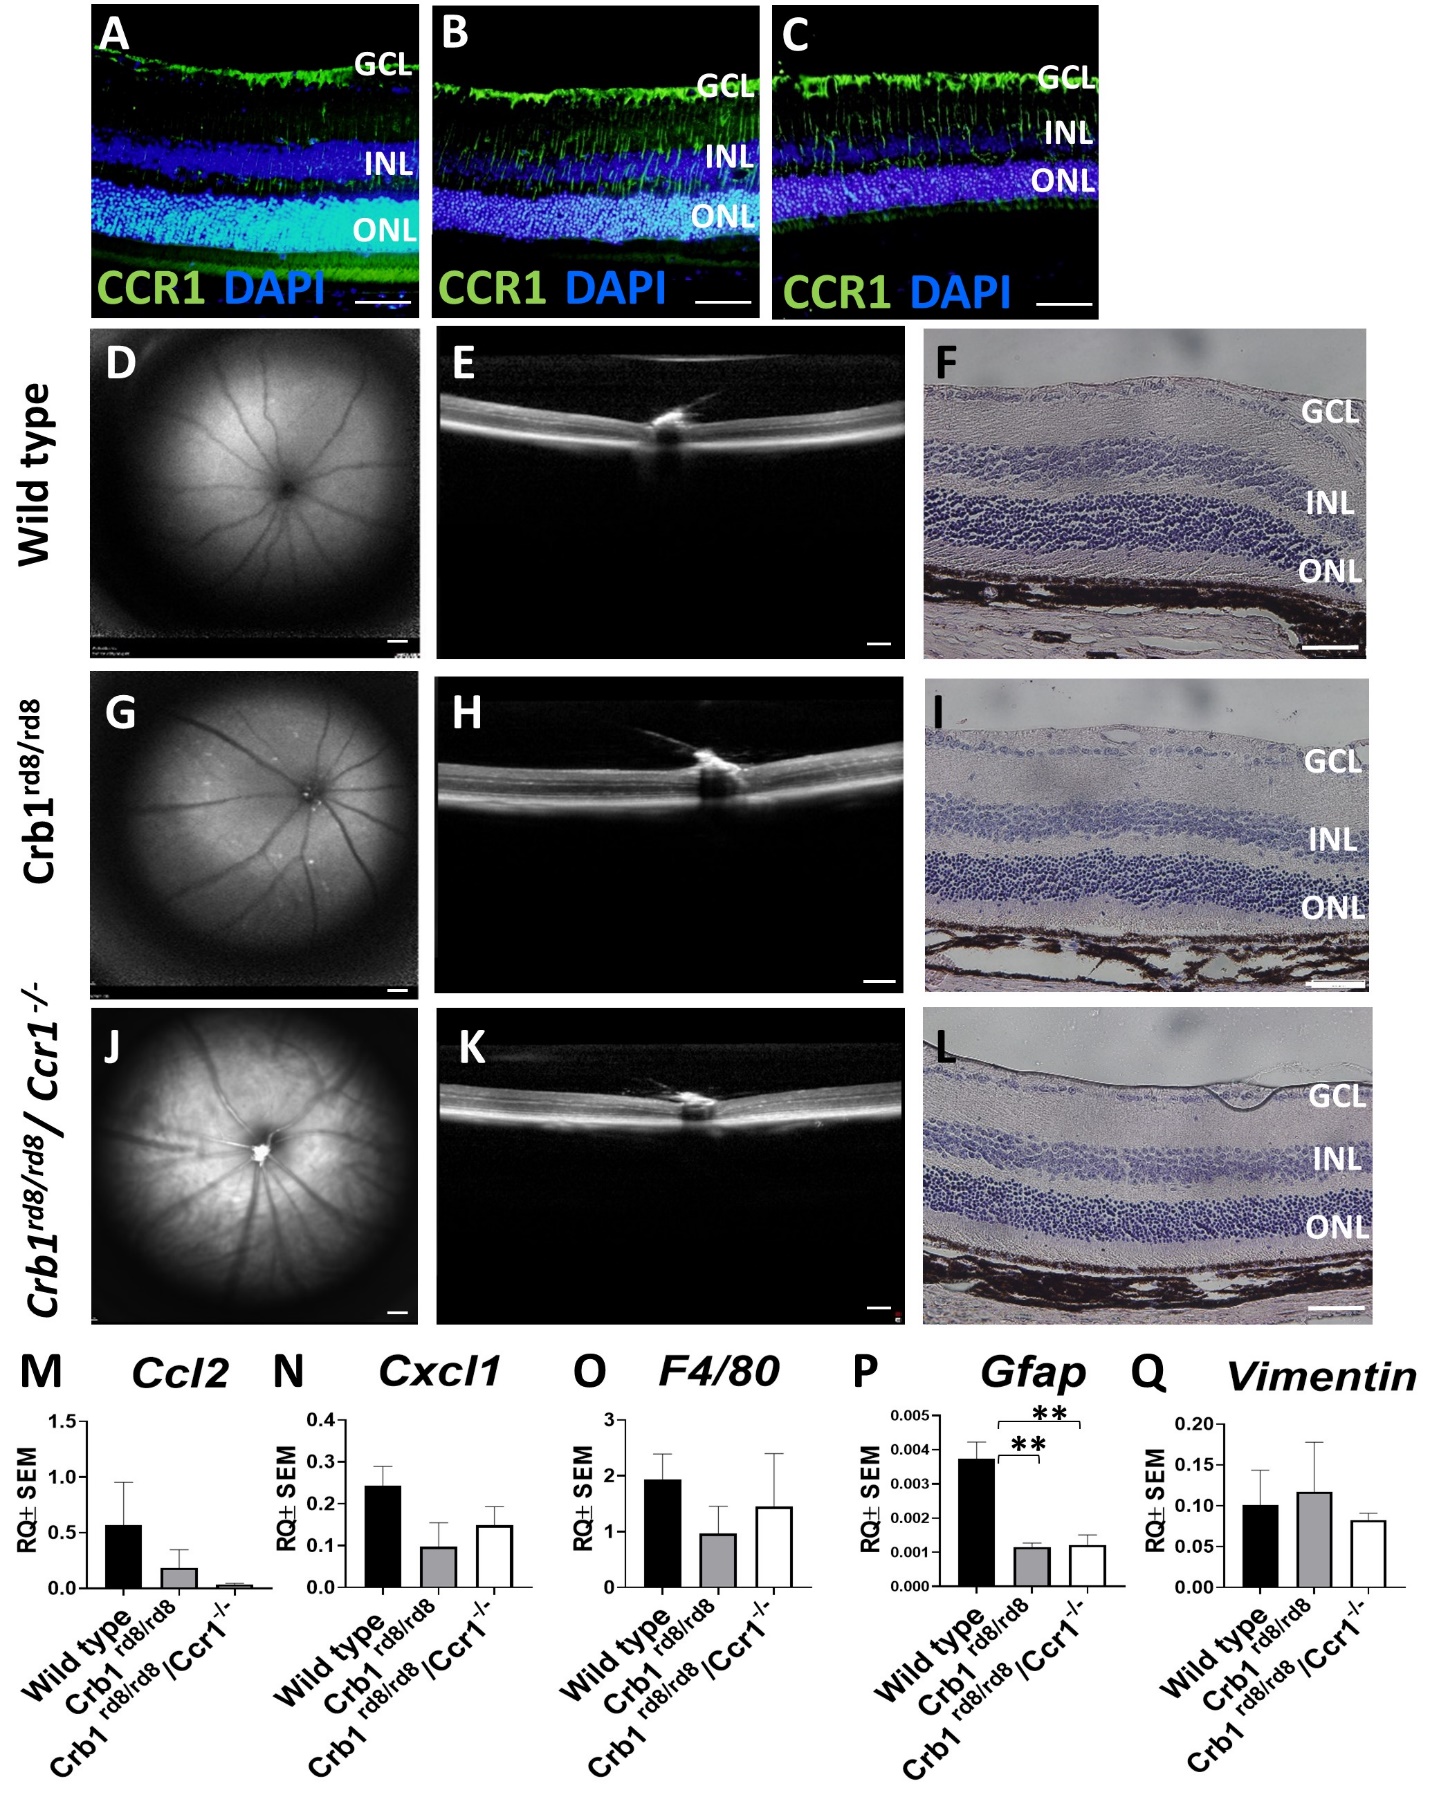


**Fig. S1.** Retinal imaging, histology and inflammation in Crb1rd8/ rd8/Ccr1-/-mice. (**A-C**) Enhanced CCR1 signal is detected in retina of Crb1rd8/rd8 mice at the age of 10 and 15 months (**B** and **C**, respectively) compared with wild-type mice at the age of 15 months (**A**). (**D-L**) At 10 months, fundus auto-fluorescence (FAF) showed no abnormal retinal lesions in any of the groups (**D, G, J**), and OCT imaging (**E, H, K**), and histological analysis (**F, I, L**) showed no retinal structural alterations. (**M-Q**) qPCR analysis of *Ccl2*, *Cxcl1*, *F4/80* and *Vimentin* demonstrated similar expression levels across the three groups (n=4 per group; **M, N, O, Q**). *Gfap* mRNA levels were upregulated in wild-type mice compared to Crb1rd8/ rd8 and Crb1rd8/ rd8/Ccr1-/- mice (n=4 per group; **P**). GCL, ganglion cell layer; INL, inner nuclear layer; ONL, outer nuclear layer. Data shown as mean ± SEM. p-values indicated by **p<0.01, one-way ANOVA with correction for multiple comparisons. Scale bars: 200 µm (**A-L**).
